# Supplementary material for: Preventable Disease, the Case of Colorado: School District Demographics and Childhood Immunizations
Source: Vaccines (Basel). 2022 Sep 21;10(10):1579. doi: 10.3390/vaccines10101579 (PMC9607491; doi:10.3390/vaccines10101579)
Supplement: Supplementary file 1 [file vaccines-10-01579-s001.zip › vaccines-1893195-supplementary.pdf]

**Supplementary Table S1. Colorado school district compliance and exemption type rates by vaccine. Mean, SD,**

Minimum and Maximum values estimated from School District aggregate data.

| Parameter |         | Fully Immunized % | In Process % | Incomplete Record % | Medical Exemption % | No Record % | Personal Exemption % | Religious Exemption % | Compliant For All % |
|-----------|---------|-------------------|--------------|---------------------|---------------------|-------------|----------------------|-----------------------|---------------------|
| All       | Mean    | 92.7%             | 0.6%         | 1.8%                | 0.1%                | 0.8%        | 3.7%                 | 0.3%                  | 94.7%               |
|           | Std Dev | 6.7%              | 2.1%         | 3.4%                | 0.4%                | 2.3%        | 4.1%                 | 0.7%                  | 7.8%                |
|           | Minimum | 28.3%             | 0.0%         | 0.0%                | 0.0%                | 0.0%        | 0.0%                 | 0.0%                  | 39.3%               |
|           | Maximum | 100.0%            | 33.6%        | 51.5%               | 15.1%               | 70.7%       | 48.8%                | 8.3%                  | 100.0%              |
| DTaP      | Mean    | 93.8%             | 0.4%         | 1.4%                | 0.1%                | 0.7%        | 3.4%                 | 0.3%                  | 94.8%               |
|           | Std Dev | 5.7%              | 1.3%         | 2.8%                | 0.3%                | 1.6%        | 3.7%                 | 0.7%                  | 7.8%                |
|           | Minimum | 44.7%             | 0.0%         | 0.0%                | 0.0%                | 0.0%        | 0.0%                 | 0.0%                  | 39.3%               |
|           | Maximum | 100.0%            | 21.7%        | 40.9%               | 6.8%                | 16.3%       | 40.6%                | 7.7%                  | 100.0%              |
| HepB      | Mean    | 94.0%             | 0.4%         | 1.1%                | 0.1%                | 0.7%        | 3.5%                 | 0.3%                  | 94.8%               |
|           | Std Dev | 5.6%              | 1.4%         | 2.0%                | 0.3%                | 1.7%        | 3.9%                 | 0.7%                  | 7.8%                |
|           | Minimum | 44.2%             | 0.0%         | 0.0%                | 0.0%                | 0.0%        | 0.0%                 | 0.0%                  | 39.3%               |
|           | Maximum | 100.0%            | 22.1%        | 22.5%               | 6.8%                | 16.3%       | 39.7%                | 7.7%                  | 100.0%              |
| MMR       | Mean    | 93.5%             | 0.4%         | 1.3%                | 0.1%                | 0.7%        | 3.6%                 | 0.3%                  | 94.8%               |
|           | Std Dev | 5.8%              | 1.4%         | 2.2%                | 0.3%                | 1.8%        | 4.0%                 | 0.7%                  | 7.8%                |
|           | Minimum | 45.2%             | 0.0%         | 0.0%                | 0.0%                | 0.0%        | 0.0%                 | 0.0%                  | 39.3%               |
|           | Maximum | 100.0%            | 21.2%        | 23.8%               | 6.8%                | 18.7%       | 42.0%                | 7.2%                  | 100.0%              |
| Polio     | Mean    | 93.3%             | 0.5%         | 1.5%                | 0.1%                | 0.7%        | 3.7%                 | 0.3%                  | 94.8%               |
|           | Std Dev | 5.9%              | 1.4%         | 2.5%                | 0.3%                | 1.7%        | 4.0%                 | 0.7%                  | 7.8%                |
|           | Minimum | 43.8%             | 0.0%         | 0.0%                | 0.0%                | 0.0%        | 0.0%                 | 0.0%                  | 39.3%               |
|           | Maximum | 100.0%            | 22.6%        | 23.8%               | 6.8%                | 16.3%       | 41.1%                | 7.7%                  | 100.0%              |
| Tdap      | Mean    | 89.6%             | 1.3%         | 3.6%                | 0.1%                | 1.2%        | 3.9%                 | 0.3%                  | 94.3%               |
|           | Std Dev | 9.2%              | 3.8%         | 5.8%                | 0.6%                | 4.1%        | 4.8%                 | 0.8%                  | 8.3%                |
|           | Minimum | 28.3%             | 0.0%         | 0.0%                | 0.0%                | 0.0%        | 0.0%                 | 0.0%                  | 39.3%               |
|           | Maximum | 100.0%            | 33.6%        | 51.5%               | 15.1%               | 70.7%       | 48.8%                | 8.3%                  | 100.0%              |
| Varicella | Mean    | 92.2%             | 0.6%         | 1.8%                | 0.2%                | 0.8%        | 4.1%                 | 0.3%                  | 94.8%               |
|           | Std Dev | 6.5%              | 1.7%         | 3.1%                | 0.5%                | 1.8%        | 4.4%                 | 0.7%                  | 7.8%                |
|           | Minimum | 42.4%             | 0.0%         | 0.0%                | 0.0%                | 0.0%        | 0.0%                 | 0.0%                  | 39.3%               |
|           | Maximum | 100.0%            | 24.0%        | 35.0%               | 6.8%                | 16.3%       | 44.3%                | 7.2%                  | 100.0%              |
